# Supplementary material
Source: Springer Nature journal article supplement (https://www.springermedizin.de/resource/supplementary/12936_2013_3152_MOESM10_ESM.pdf/9546286)
Supplement: MOESM10 [file 9546286]

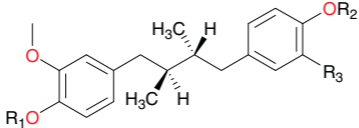

4,4'-Dihydroxy-3-methoxylignan (**97**):  $R_1 = H$ ,  $R_2 = H$ ,  $R_3 = OH$

(-)-Dihydroguaiaretic acid (**98**):  $R_1 = H$ ,  $R_2 = H$ ,  $R_3 = OCH_3$

4'-Hydroxy-3,3',4-trimethoxylignan (**99**):  $R_1 = CH_3$ ,  $R_2 = H$ ,  $R_3 = OCH_3$

4,4'-Diacetyl-3,3'-dimethoxylignan (**100**):  $R_1 = H$ ,  $R_2 = CH_3$ ,  $R_3 = OCH_3$

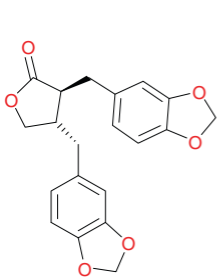

Talaumidin (**101**)

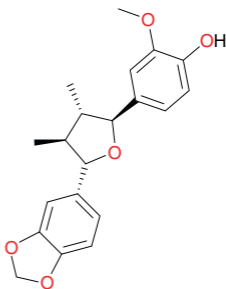

Hinokinin (**102**)

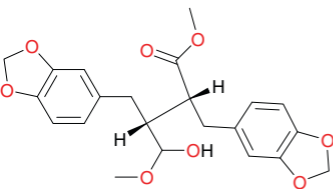

Heliobupphthalmin (**103**)

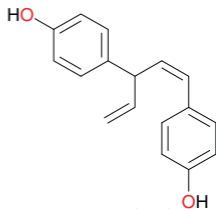

Nyasol (**104**)
